# Supplementary material for: GABA attenuates ETEC-induced intestinal epithelial cell apoptosis involving GABAAR signaling and the AMPK-autophagy pathway
Source: Royal Society of Chemistry journal article supplement (doi:10.1039/c9fo01863h), 2019-01-01
Supplement: c9fo01863h4.pdf [file c9fo01863h4.pdf]

## Supplementary figure captions

**SF.1 Effects of GABA on secretion of pro-inflammatory cytokines and cell cycle in ETEC-infected IPEC-J2 cells.** (A) Levels of IL-6, (B) IL-8, (C) IL-1 $\beta$  and (D) TNF- $\alpha$  (n=4). (E) Representative images of flow cytometry analysis for cell cycle (n=4). (F) Statistical analysis of cell count (%) (n=4). (G) Relative mRNA expression of Cyclin A1, (H) Cyclin B1, and (I) Cyclin D1 (n=4). Data are expressed as mean  $\pm$  SD or SEM. Asterisks indicate statistically significant differences as analyzed by one-way ANOVA (\*  $P < 0.05$ , \*\*  $P < 0.01$ , \*\*\*  $P < 0.001$ , \*\*\*\*  $P < 0.0001$ ).

**SF.2 Effects of GABA on growth performance and levels of serum pro-inflammatory cytokines in ETEC-infected piglets.** (A) ADG (n=6-8). (B) Feed:Gain ratio (n=6-8). (C) Levels of serum IL-6, (D) IL-8, (E) IL-1 $\beta$  and (F) TNF- $\alpha$  (n=6). Data are expressed as mean  $\pm$  SD. Asterisks indicate statistically significant differences as analyzed by one-way ANOVA (\*  $P < 0.05$ , \*\*  $P < 0.01$ , \*\*\*  $P < 0.001$ , \*\*\*\*  $P < 0.0001$ ).

**SF.3 A diagram for potential mechanism connecting to the autophagy pathway affected by GABA/ETEC treatment in this study.** Red: increase; Green: decrease; Grey: undetected;  $\rightarrow$ : promote;  $\leftarrow$ : inhibit.
