# Supplementary figures and images for: GABA attenuates ETEC-induced intestinal epithelial cell apoptosis involving GABAAR signaling and the AMPK-autophagy pathway
Source: Royal Society of Chemistry journal article supplement (doi:10.1039/c9fo01863h), 2019-01-01

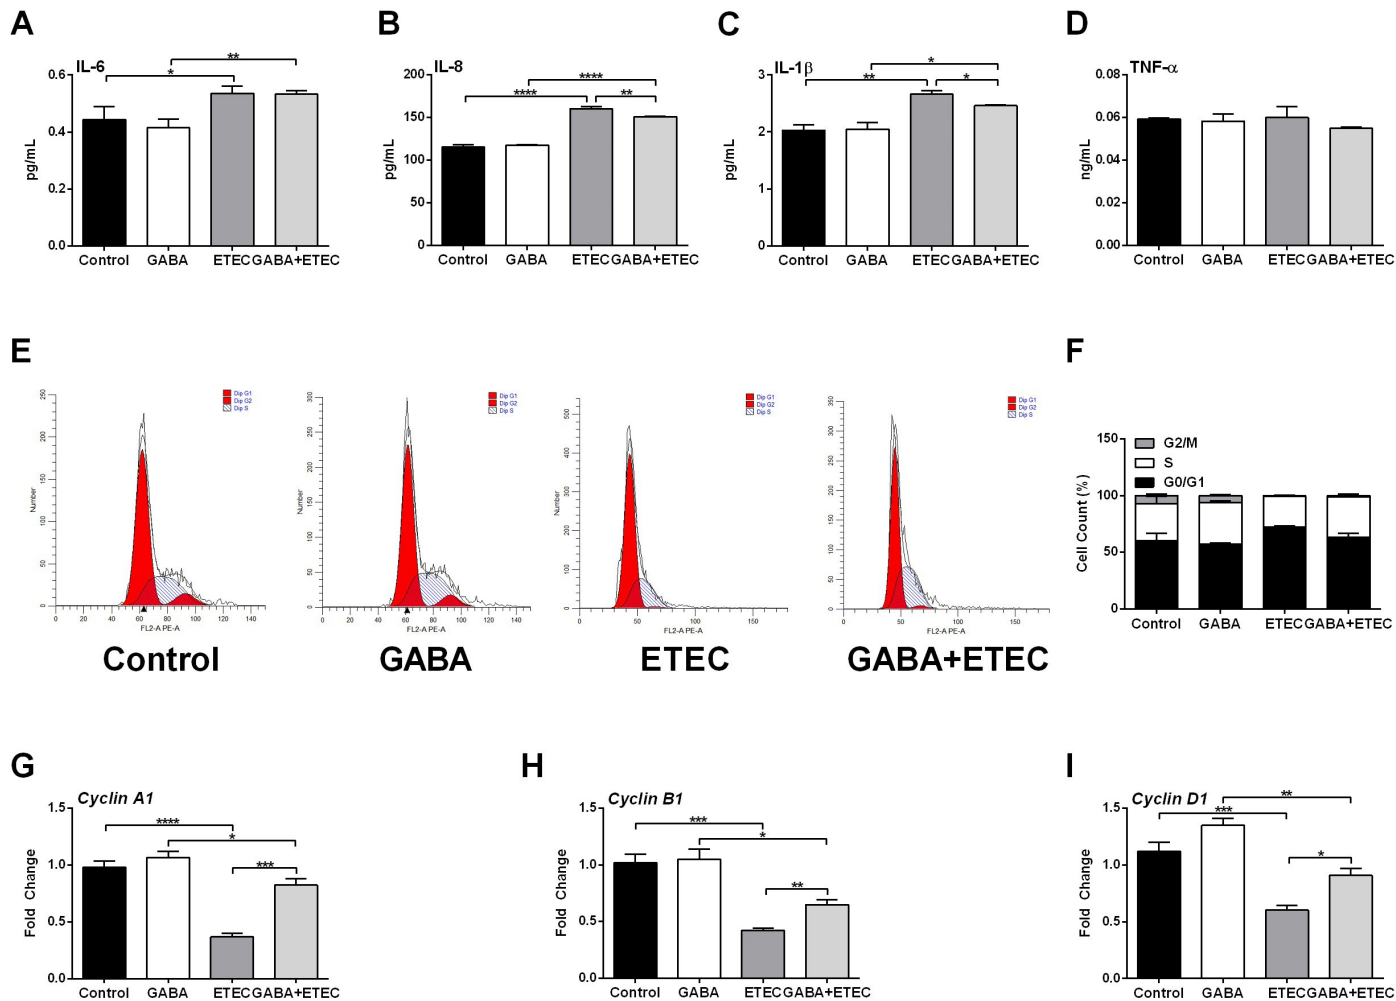

Supplement: c9fo01863h1.pdf [file c9fo01863h1.pdf]
